# Supplementary material
Source: HighWire-hosted journal article supplement (https://bmjpaedsopen.bmj.com/content/3/1/e000519)
Supplement: inline-supplementary-material-1 [file inline-supplementary-material-1.pdf]

## **Semi-structured interview questions**

*(Research Dolpa, Nepal, 2018)*

The research questions will be done in a comfortable and familiar environment in the local language, either in Nepali or Tibetan.

### ***1., How the death of a new-born is perceived by the family:***

Which reasons are considered to be behind it.

Is it the will of gods?

Is it fate?

Is it due to wrong behaviour?

Is it considered serious?

Is there anyone blamed for it?

Which consequences does it have for the woman and for the family?

### ***2., How the main childhood diseases like ARI's and diarrhoeal diseases are prevented by local remedies:***

Which is the preferred treatment for childhood illnesses.

Are traditional remedies the first choice?

And if, which remedies are used?

Are traditional faith healers commonly called?

Are modern treatments preferred, if available?

Are local remedies and modern treatments used in combination?

### ***3., Which solutions the community is proposing as prevention:***

Is there enough health staff provided?

Are there enough health posts?

Is the health staff in your opinion competent?

Is the health staff usually providing sufficient support?

Should be more local staff be involved?

Do you have trust in the government health staff?

Or would you prefer a re-vitalisation of the traditional medicine?

Is there sufficient medicine available?

How does a referral work?
